# Supplementary material for: Hemocyte Changes During Immune Melanization in Bombyx Mori Infected with Escherichia coli
Source: MDPI journal article supplement (doi:10.3390/insects10090301), 2019-09-16
Supplement: s1 [file s1]

## Supplementary Materials

Tables S1. Hemocytes melanization levels of fifth instar larvae infected 10  $\mu$ L *E. coli*.

| Infection Times                                       | 0 h | 1 h | 2 h                   | 3 h                     | 6 h                     | 9 h                    | 12 h                    | 18 h                    | 24 h                    |
|-------------------------------------------------------|-----|-----|-----------------------|-------------------------|-------------------------|------------------------|-------------------------|-------------------------|-------------------------|
| Areas of melanized hemocytes ( $\mu$ m <sup>2</sup> ) | 0   | 0   | 624.59<br>$\pm$ 94.91 | 1309.72<br>$\pm$ 188.80 | 3600.25<br>$\pm$ 128.50 | 3716.64<br>$\pm$ 69.49 | 4497.53<br>$\pm$ 265.04 | 3985.49<br>$\pm$ 188.93 | 3197.57<br>$\pm$ 148.32 |

Figure S1

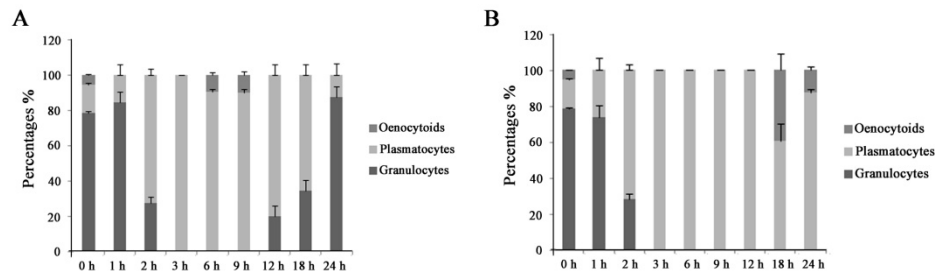

**Figure S1.** Major hemocyte types percentage in fifth instar larvae infected 5  $\mu$ L (A) and 10  $\mu$ L (B) *E. coli*. 0 h, 1 h, 2 h, 3 h, 6 h, 9 h, 12 h, 18 h and 24 h represent times after injection bacteria. Values are shown as mean + SD. (n = 4)

Figure S2

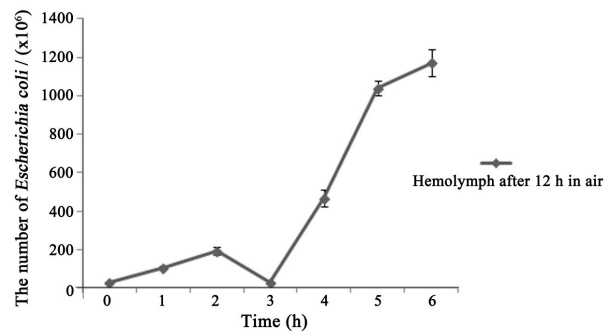

**Figure S2.** Bacteria growth by counting colony numbers after incubation. The colony numbers are mean  $\pm$  SD for 3 independent determinations. "Hemolymph after 12 h in air" represents the mixture of *E. coli* and hemolymph after 12 h in air.
